# Supplementary material
Source: Springer Nature journal article supplement (https://www.springermedizin.de/resource/supplementary/12876_2010_541_MOESM1_ESM.pdf/9437338)
Supplement: MOESM1 [file 9437338]

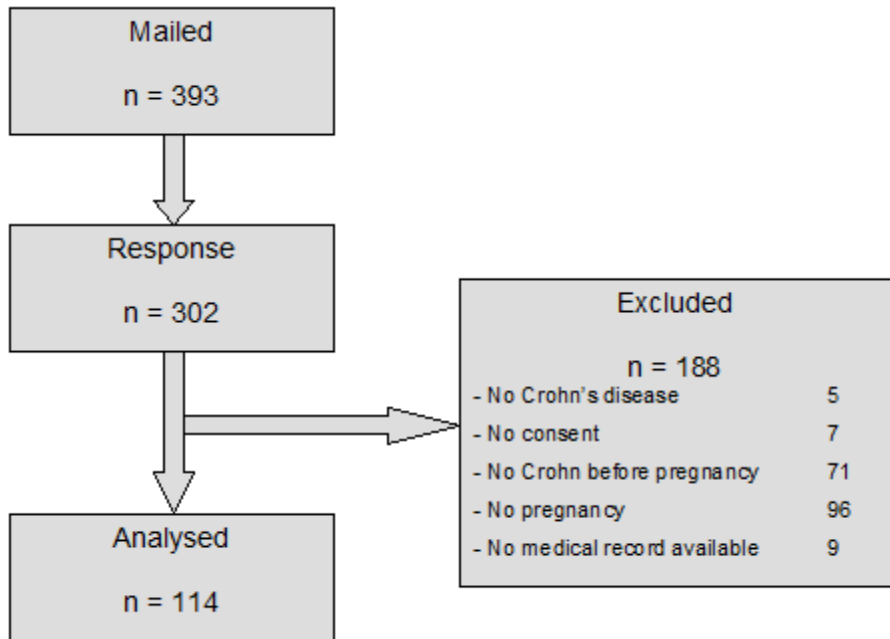

Mailed  
n = 393

Response  
n = 302

Analysed  
n = 114

Excluded  
n = 188

- No Crohn's disease 5
- No consent 7
- No Crohn before pregnancy 71
- No pregnancy 96
- No medical record available 9
